# Supplementary figures and images for: TET1 exerts its tumour suppressor function by regulating autophagy in glioma cells
Source: PubMed Central journal article supplement (PMC5672083; doi:10.1042/bsr20160523), 2017-11-06

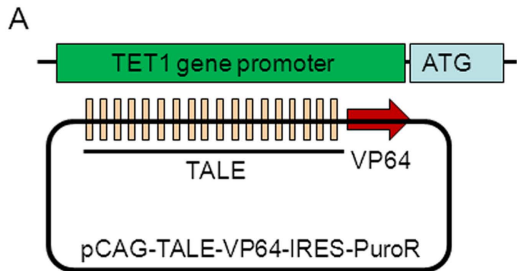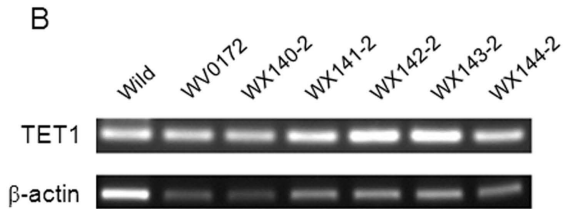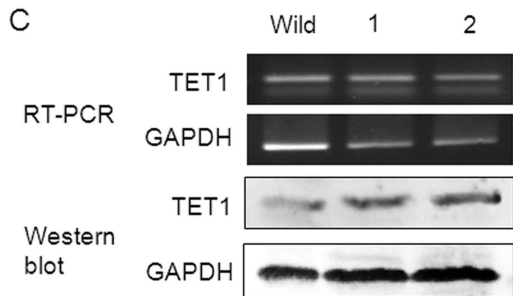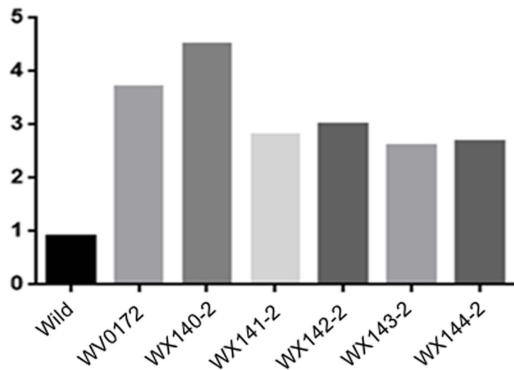

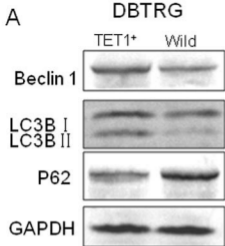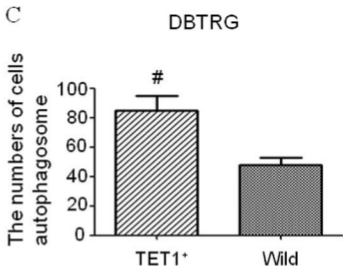

**B** DBTRG

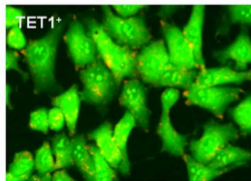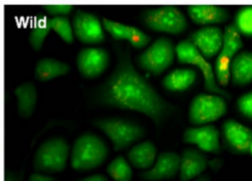

Supplement: bsr20160523_Supp1.pdf [file bsr20160523_Supp1.pdf]
